# Supplementary material for: The Role of Women on Dairy Goat Farms in Southern Spain
Source: MDPI journal article supplement (doi:10.3390/ani12131686), 2022-06-30
Supplement: s1 [file s1]

### Survey for Data Collection

Estimado miembro de la "Asociación de criadores de la cabra Florida (ACRIFLOR)": Muchas gracias por su participación en esta encuesta anónima. Solicitamos su nombre por si necesitamos consultar alguno de los datos registrados en las bases de datos de ACRIFLOR. Con esta excepción, la encuesta es completamente anónima y bajo ninguna circunstancia se publicará información que pueda identificarle a usted o a su granja. Con estos datos, pretendemos hacer análisis estadísticos con el objetivo de publicarlos en congresos, revistas científicas y/o de divulgación. Por otra parte, nos comprometemos a mandarle, vía ACRIFLOR, los resultados de cualquier estudio que llevemos a cabo usando estos datos. Finalmente, le agradecemos su participación desinteresada en esta encuesta.

**Fecha:**

**Nombre:**

#### **I. ASPECTOS GENERALES**

1. Nombre de la Unidad de Producción:

.....  
.....

.....

2. Ubicación (Término Municipal, Provincia):

.....  
.....

.....

3. Población más cercana: .....

Distancia: .....Km.

4. Sistema de explotación: Estabulado: ..... Semi-Estabulado:

.....

5. Hace uso del Campo?: Sí: .....No: .....

Cuál?: Olivar: .....Dehesa: .....Campaña-Cultivo (Vega): .....Sierra: .....

Espacio Natural Protegido: .....

6. Nombre del Encuestado:

.....

Sexo: ..... Edad: .....años.

7. Condición del encuestado: Propietario: .....Encargado: .....Ambos:

.....

8. Nombre del Propietario:

.....

¿Aparece como Titular?: Sí: .....No: .....

En caso de "NO": ¿Quién es el Titular?:

.....

Relación con el encuestado:

.....

9. En caso de que el encuestado no sea el Propietario, preguntar adicionalmente datos del propietario y/o Titular:

| Propietario | Titular    |
|-------------|------------|
| Nombre:     | Nombre:    |
| Edad:       | Edad:      |
| Sexo:       | Sexo:      |
| Ocupación:  | Ocupación: |

10. ¿Trabaja el propietario como ganadero?: Sí: ..... No: .....

11. Número de personas que componen la Unidad familiar del ganadero:

.....

12. Antigüedad de la explotación:

.....

Tipo de empresa: Familiar: ....., Individual: ....., Sociedad: .....,  
Cooperativa: ....., Autónomo: ....., Comunidad de bienes: .....

¿Vive el ganadero en la Unidad de Producción?: Sí: ....., No: .....

En caso de NO, distancia de su casa a la Unidad de Producción: .....Km

13. Nivel de estudios del ganadero:

.....

14. Cursos de formación reciente del ganadero: No: ..... Sí: .....

En caso de "SI", especifique:

.....

.....

.....

15. ¿Le gustaría que sus hijos continuaran con la actividad ganadera?: No: .....

Sí: .....

¿Por qué?:

.....

.....

.....

16. ¿Le gustaría que sus hijos estudiaran o hicieran otra actividad distinta de la ganadera?:

No: ..... Sí: ..... ¿Por qué?:

.....

.....

.....

17. ¿Recibe asistencia técnica?: Sí: .....No: .....

Si la respuesta es SI:

| ÁREA             | FRECUENCIA | TIPO DE TÉCNICO | SEXO | INSTITUCIÓN | Coste (€) |
|------------------|------------|-----------------|------|-------------|-----------|
| Salud Animal     |            |                 |      |             |           |
| Reproducción     |            |                 |      |             |           |
| Nutrición        |            |                 |      |             |           |
| Manejo de Pastos |            |                 |      |             |           |
| Genética         |            |                 |      |             |           |
| Registros        |            |                 |      |             |           |
| Otra             |            |                 |      |             |           |
| .....            |            |                 |      |             |           |

## II. CARACTERÍSTICAS DE LA MUJER

1. ¿Trabaja alguna mujer en la explotación?: No: ..... Sí: .....

2. Relación con el propietario. Esposa: ..... Hija: ..... Empleada:

.....

3. Otros:

.....

.....

4. Edad: .....años

5. Nivel de Formación:

.....

.....

.....

6. ¿Es propietaria de la explotación?:

.....

7. ¿Desde qué año lleva trabajando con caprinos?:

.....

8. ¿Por qué razón trabaja en la explotación?:

.....

.....

.....

9. ¿Tiene hijos?: No: ..... Sí: ..... Edad de cada uno: 1º....., 2º....., 3º....., 4º.....

Más.....

.....

10. Lugar de residencia:

.....

.....

.....

11. ¿Percibe un sueldo?: No: ..... Sí: ..... Cantidad (Euros):

.....

¿Cotiza en la Seguridad Social?: No: ..... Sí: .....

12. Labores que realiza en la explotación a diario:

| Labores dentro de la explotación     | Horas de Dedicación | Labores fuera de la explotación | Horas de dedicación |
|--------------------------------------|---------------------|---------------------------------|---------------------|
| Ordeño                               |                     | Tareas del Hogar                |                     |
| Limpieza de nave                     |                     | Estudios                        |                     |
| Pastoreo                             |                     | Trabajo                         |                     |
| Alimentación                         |                     | Descanso                        |                     |
| Tratamientos sanitarios              |                     | Otros:                          |                     |
| Elaboración de queso (actualmente)   |                     |                                 |                     |
| Elaboración de queso (anteriormente) |                     |                                 |                     |
| Tiene permiso para elab. Queso       |                     |                                 |                     |
| Otros:                               |                     |                                 |                     |

13. ¿Le gustaría realizar otra actividad?: No: ..... Sí: ..... ¿Por qué?:

.....

.....

.....

14. ¿Dejaría el negocio de las cabras?: No: ..... Sí: ..... ¿Por qué?:

.....

.....

.....

.....

.....

15. ¿Quiere invertir más en la producción caprina?: No: ..... Sí: ..... ¿Por qué?.....

.....

.....

.....

.....

16. ¿Deberían sus hijos continuar con la actividad ganadera?: No: ..... Sí:

.....

¿Por

qué?:.....

.....

.....

.....

17. ¿Deberían sus hijos estudiar o hacer algo fuera de la actividad ganadera? No: ..... Sí: ..... ¿Por qué?:

.....

.....

.....

.....

18. Toma de decisiones: más: +, menos: -, ninguno: /, Igual:=. Hombre: H, Mujer: M.

|                            | Actividad                                | Nivel de Decisión |   | Comentarios |
|----------------------------|------------------------------------------|-------------------|---|-------------|
|                            |                                          | H                 | M |             |
| <b>Producción ganadera</b> | Autoconsumo                              |                   |   |             |
|                            | Venta                                    |                   |   |             |
|                            | Inicio de una actividad fuera de la UP   |                   |   |             |
|                            | Inicio de otra actividad dentro de la UP |                   |   |             |
| <b>Económico</b>           | Solicitud de Préstamo                    |                   |   |             |
|                            | Inversión                                |                   |   |             |
|                            | Gastos del hogar                         |                   |   |             |
|                            | Gastos en Educación                      |                   |   |             |

|                   |                            |  |  |  |
|-------------------|----------------------------|--|--|--|
|                   | Gastos en salud            |  |  |  |
|                   | Desarrollo de la Ganadería |  |  |  |
| <b>Recreación</b> | Salidas de paseo           |  |  |  |
|                   | Vacaciones                 |  |  |  |
|                   | Actividades extraescolares |  |  |  |

### III. ESTRUCTURA DE LA MANO DE OBRA

1. Estructura de la mano de obra (Nº de trabajadores):

Familiares: ..... Remunerados?: Si: ..... ¿Cuántos?:.....No: .....  
¿ Cuántos?: .....

Fijos: ..... Salario: ..... Dedicación:  
.....

Eventuales: ..... Salario: ..... Dedicación:  
.....

2. Distribución de actividades: Tipo de trabajador: Familiar, fijo, eventual.

Actividad: Ordeñador, tractorista, quesero, etc.

| TIPO DE TRABAJADOR | SEXO | ACTIVIDADES | NIVEL EDUCATIVO | TIEMPO (meses) |
|--------------------|------|-------------|-----------------|----------------|
|                    |      |             |                 |                |
|                    |      |             |                 |                |
|                    |      |             |                 |                |
|                    |      |             |                 |                |

### IV. DATOS GENERALES DE LA UNIDAD DE PRODUCCIÓN

1. Estructura del rebaño.

1.1. Inventario animal:

| <b>ANIMAL</b>        | <b>Número</b> |
|----------------------|---------------|
| Cabras: TOTALES      |               |
| Paridas Ordeño Secas |               |
| Descarte             |               |
|                      |               |
| Cabritos/as lechales |               |
| Chivas reposición    |               |

|                   |  |
|-------------------|--|
| Chivas venta cría |  |
| Machos            |  |

1.2. Datos productivos y reproductivos:

| <b>ITEMS</b>                     | <b>CANTIDAD</b> |
|----------------------------------|-----------------|
| <b>Producción de leche</b>       |                 |
| Producción de leche (L/año)      |                 |
| Leche/cabra/día (L)              |                 |
| Lactancias Válidas (N.) (C.L.O.) |                 |
| Recuento de células somáticas    |                 |
| Bacteriología                    |                 |
| Incidencia Mastitis              |                 |
| <b>Datos reproductivos</b>       |                 |
| Fertilidad (%)                   |                 |
| Épocas                           |                 |
| <i>Técnicas reproductivas:</i>   |                 |
| Efecto Macho Melatonina          |                 |
| Inseminación Artificial          |                 |
| Esponjas                         |                 |
| <b>Producción de cabritos</b>    |                 |
| Prolificidad (%)                 |                 |
| Mortalidad                       |                 |
| <b>Esquema de selección</b>      |                 |
| Altas                            |                 |
| Bajas                            |                 |
| Parte de cubriciones             |                 |
| Parte de nacimientos             |                 |
| C.L.O                            |                 |
